# Supplementary material for: Effect of Carotene and Lycopene on the Risk of Prostate Cancer: A Systematic Review and Dose-Response Meta-Analysis of Observational Studies
Source: PLoS One. 2015 Sep 15;10(9):e0137427. doi: 10.1371/journal.pone.0137427 (PMC4570783; doi:10.1371/journal.pone.0137427)
Supplement: S1 Table — (DOCX) [file pone.0137427.s002.docx]

| Source | Selection | | | | Comparability5 | Exposure | | | Total9 |
| --- | --- | --- | --- | --- | --- | --- | --- | --- | --- |
| Definition1 | Representativeness2 | Selection3 | Definition4 | Ascertainment6 | Method7 | Rate8 |
| Key,2007 | ☆ | ☆ | ☆ | ☆ | ☆☆ | ☆ | ☆ | 0 | 8 |
| Huang,CLUE I 2002 | ☆ | ☆ | ☆ | ☆ | ☆☆ | ☆ | ☆ | 0 | 8 |
| Huang,CLUE II 2002 | ☆ | ☆ | ☆ | ☆ | ☆☆ | ☆ | ☆ | 0 | 8 |
| Goodman,2003 | ☆ | ☆ | ☆ | ☆ | 0 | ☆ | ☆ | 0 | 6 |
| Gann,1999 | ☆ | 0 | ☆ | ☆ | ☆ | ☆ | ☆ | 0 | 6 |
| Nomura,1997 | ☆ | 0 | ☆ | 0 | 0 | ☆ | ☆ | 0 | 4 |
| Shibata,1992 | ☆ | ☆ | ☆ | 0 | ☆ | ☆ | ☆ | ☆ | 7 |
| Andersson,1996 | ☆ | ☆ | ☆ | ☆ | ☆ | ☆ | ☆ | 0 | 7 |
| Schuurman,2002 | ☆ | ☆ | ☆ | ☆ | ☆☆ | ☆ | ☆ | ☆ | 9 |
| Norrish,1998 | ☆ | ☆ | ☆ | ☆ | ☆ | ☆ | ☆ | 0 | 7 |
| Bosetti,2004 | ☆ | ☆ | 0 | ☆ | ☆☆ | ☆ | ☆ | ☆ | 8 |
| Mettlin,1989 | ☆ | ☆ | ☆ | ☆ | ☆ | ☆ | ☆ | 0 | 7 |
| Giovannucci,1995 | ☆ | ☆ | ☆ | ☆ | ☆☆ | ☆ | ☆ | 0 | 8 |
| Ambrosini,2008 | ☆ | ☆ | ☆ | ☆ | ☆☆ | ☆ | ☆ | 0 | 8 |
| Beilby,2010 | ☆ | ☆ | ☆ | ☆ | ☆☆ | ☆ | ☆ | 0 | 8 |
| Zhang,2007 | ☆ | 0 | 0 | ☆ | ☆☆ | ☆ | ☆ | 0 | 6 |
| Wu,2004 | ☆ | ☆ | ☆ | ☆ | ☆☆ | ☆ | ☆ | ☆ | 9 |
| Kirsh,2006 | ☆ | ☆ | ☆ | ☆ | ☆☆ | ☆ | ☆ | 0 | 8 |
| Jian,2005 | ☆ | 0 | 0 | ☆ | ☆☆ | ☆ | ☆ | ☆ | 7 |
| Umesawa,2013 | 0 | ☆ | ☆ | ☆ | ☆☆ | ☆ | ☆ | 0 | 7 |
| Daviglus,1996 | ☆ | ☆ | ☆ | ☆ | ☆☆ | ☆ | ☆ | 0 | 8 |
| Roswall,2013 | ☆ | ☆ | ☆ | ☆ | ☆☆ | ☆ | ☆ | 0 | 8 |
| Chang,2005 | ☆ | ☆ | 0 | ☆ | ☆ | ☆ | ☆ | 0 | 6 |
| McCann,2009 | ☆ | ☆ | ☆ | ☆ | ☆☆ | ☆ | ☆ | 0 | 8 |
| Peters,2007 | ☆ | ☆ | ☆ | ☆ | ☆☆ | ☆ | ☆ | 0 | 8 |
| Gill,2009  Deneo-Pelligrini**,**1999  Cohen,2000  Lu,2001  Meyer,1997  Jain,1999  Karppi,2009  Agalliu,2011  Hsing,1990 | ☆  ☆  ☆  ☆  ☆  ☆  ☆  ☆  ☆ | ☆  ☆  ☆  ☆  ☆  ☆  ☆  ☆  ☆ | ☆  0  ☆  0  ☆  ☆  ☆  ☆  ☆ | ☆  ☆  ☆  ☆  ☆  ☆  ☆  ☆  ☆ | ☆☆  ☆☆  ☆☆  ☆☆  ☆☆  ☆☆  ☆☆  ☆☆  ☆☆ | ☆  ☆  ☆  ☆  ☆  ☆  ☆  ☆  ☆ | ☆  ☆  ☆  ☆  ☆  ☆  ☆  ☆  ☆ | 0  0  ☆  0  ☆  ☆  0  0  0 | 8  7  9  7  9  9  8  8  8 |

|  |
| --- |
|  |
| 1Adequate definition of cases(0,1star)  2Consecutive or obviously representative series of cases (0,1)  3Selection of controls: Community controls (0,1)  4Definition of controls: No history of disease (endpoint) (0,1)  5Study controls for the most important factor or any additional factor(0,1,2)  6Secure record (eg surgical records) (0,1)  7Same method of ascertainment for cases and controls(0,1)  8Same non-response rate for both groups(0,1)  9Total: minimum equals 1; maximum equals 9 stars |
|  |
|  |
|  |
|  |
|  |
|  |
|  |
